# Supplementary material
Source: MDPI journal article supplement (https://www.mdpi.com/1999-4907/14/1/17)
Supplement: s1 [file s1]

Archive with 4 entries (4 files):
- SupplementaryMaterialS1_Clones_summary.pdf
- SupplementaryMaterialS2_Dispersion_ZI.pdf
- SupplementaryMaterialS3_Prior_Convergence.pdf
- SupplementaryMaterialS4_Heritability.pdf
