# Supplementary material
Source: MDPI journal article supplement (https://www.mdpi.com/1999-4907/14/1/17)
Supplement: s1 [file s1 › SupplementaryMaterialS1_Clones_summary.pdf]

## Supplementary Material S1. Summary of clones fertility

Table S1. 1: Statistics of clones cones production in Silver fir clonal seed orchard

| Clone | Mean  | SD    | Median | Mad   | Min | Max | Range | Skewness | Kurtosis | SE    |
|-------|-------|-------|--------|-------|-----|-----|-------|----------|----------|-------|
| 3.1   | 55.67 | 49.84 | 50.0   | 47.44 | 0   | 180 | 180   | 0.93     | 3.17     | 10.17 |
| 3.2   | 52.75 | 53.22 | 37.5   | 50.41 | 0   | 320 | 320   | 1.42     | 6.13     | 4.26  |
| 3.5   | 46.22 | 46.13 | 37.0   | 53.37 | 0   | 175 | 175   | 0.81     | 2.77     | 6.28  |
| 3.13  | 27.97 | 31.51 | 19.0   | 28.17 | 0   | 106 | 106   | 1.09     | 3.14     | 5.75  |
| 3.16  | 57.29 | 55.57 | 41.0   | 53.37 | 0   | 190 | 190   | 0.87     | 2.60     | 8.02  |
| 3.17  | 17.75 | 29.78 | 6.0    | 8.90  | 0   | 100 | 100   | 2.01     | 5.97     | 8.60  |
| 3.18  | 4.67  | 9.84  | 0.0    | 0.00  | 0   | 30  | 30    | 1.89     | 4.99     | 2.84  |
| 3.55  | 45.09 | 44.54 | 30.5   | 43.74 | 0   | 190 | 190   | 1.03     | 3.61     | 4.29  |
| 3.62  | 36.06 | 30.77 | 28.5   | 31.13 | 0   | 100 | 100   | 0.64     | 2.36     | 7.25  |
| 3.64  | 24.33 | 39.03 | 0.0    | 0.00  | 0   | 110 | 110   | 1.18     | 2.90     | 11.27 |
| 3.72  | 45.93 | 54.26 | 28.0   | 41.51 | 0   | 240 | 240   | 1.35     | 4.54     | 5.92  |
| 4.17  | 29.29 | 37.36 | 14.0   | 20.76 | 0   | 200 | 200   | 1.70     | 6.25     | 2.78  |
| 4.23  | 37.83 | 35.20 | 41.5   | 44.48 | 0   | 84  | 84    | 0.04     | 1.43     | 14.37 |
| 4.28  | 23.76 | 32.22 | 10.0   | 14.83 | 0   | 140 | 140   | 1.68     | 5.56     | 4.97  |
| 4.29  | 52.58 | 49.30 | 43.5   | 52.63 | 0   | 200 | 200   | 0.87     | 2.90     | 5.03  |
| 4.30  | 31.81 | 34.39 | 18.5   | 27.43 | 0   | 115 | 115   | 0.90     | 2.56     | 4.68  |
| 4.32  | 47.55 | 56.54 | 35.0   | 45.22 | 0   | 200 | 200   | 1.30     | 3.54     | 8.72  |
| 4.36  | 37.82 | 40.32 | 31.0   | 45.96 | 0   | 162 | 162   | 1.06     | 3.64     | 4.11  |
| 150   | 24.33 | 33.05 | 8.0    | 11.86 | 0   | 78  | 78    | 0.81     | 1.99     | 13.49 |
| 158   | 42.57 | 40.66 | 39.0   | 48.93 | 0   | 187 | 187   | 0.87     | 3.27     | 3.26  |
| 159   | 47.50 | 57.83 | 30.5   | 45.22 | 0   | 140 | 140   | 0.60     | 1.93     | 23.61 |
| 160   | 26.79 | 36.51 | 7.5    | 11.12 | 0   | 150 | 150   | 1.58     | 4.81     | 4.13  |
| 161   | 20.61 | 19.92 | 15.0   | 20.76 | 0   | 72  | 72    | 0.99     | 3.20     | 2.71  |
| 162   | 24.17 | 29.66 | 12.0   | 17.79 | 0   | 151 | 151   | 1.70     | 6.29     | 3.24  |
| 163   | 22.29 | 25.53 | 13.0   | 18.53 | 0   | 150 | 150   | 1.87     | 7.19     | 1.90  |
| 164   | 33.62 | 37.83 | 25.0   | 37.06 | 0   | 150 | 150   | 1.17     | 3.60     | 5.46  |
| 165   | 35.07 | 38.62 | 25.0   | 37.06 | 0   | 180 | 180   | 1.36     | 4.64     | 2.84  |
| 166   | 58.01 | 57.15 | 42.5   | 54.11 | 0   | 260 | 260   | 1.25     | 4.49     | 4.26  |
| 167   | 23.78 | 33.40 | 4.0    | 5.93  | 0   | 160 | 160   | 1.48     | 4.84     | 2.58  |
| 168   | 11.00 | 17.93 | 3.5    | 5.19  | 0   | 46  | 46    | 1.47     | 3.58     | 7.32  |
| 169   | 52.05 | 47.45 | 47.0   | 48.93 | 0   | 190 | 190   | 0.99     | 3.57     | 5.18  |
| 171   | 40.72 | 42.39 | 28.0   | 32.62 | 0   | 230 | 230   | 1.46     | 5.21     | 3.40  |
| 172   | 44.65 | 50.18 | 29.0   | 43.00 | 0   | 246 | 246   | 1.48     | 5.20     | 3.63  |
| 173   | 62.05 | 57.75 | 51.5   | 71.16 | 0   | 250 | 250   | 0.69     | 2.79     | 5.14  |
| 174   | 32.32 | 38.12 | 16.0   | 23.72 | 0   | 160 | 160   | 1.24     | 3.84     | 3.68  |
| 175   | 56.45 | 51.08 | 49.5   | 45.96 | 0   | 240 | 240   | 1.20     | 4.21     | 3.94  |
| 176   | 56.71 | 52.63 | 53.0   | 41.51 | 0   | 250 | 250   | 1.58     | 6.01     | 5.24  |
| 177   | 27.70 | 33.39 | 10.0   | 14.83 | 0   | 130 | 130   | 1.00     | 2.98     | 3.41  |
| 178   | 53.94 | 63.95 | 29.5   | 43.74 | 0   | 350 | 350   | 1.80     | 7.26     | 5.33  |
| 179   | 49.10 | 51.70 | 35.0   | 51.89 | 0   | 240 | 240   | 1.10     | 4.01     | 4.40  |
| 180   | 38.32 | 37.48 | 27.0   | 40.03 | 0   | 160 | 160   | 0.99     | 3.42     | 3.83  |

| Clone | Mean  | SD    | Median | Mad   | Min | Max | Range | Skewness | Kurtosis | SE   |
|-------|-------|-------|--------|-------|-----|-----|-------|----------|----------|------|
| 181   | 27.78 | 30.53 | 15.0   | 22.24 | 0   | 120 | 120   | 1.06     | 3.23     | 3.94 |
| 182   | 64.64 | 57.72 | 62.0   | 67.46 | 0   | 210 | 210   | 0.78     | 2.96     | 9.62 |
| 1N    | 31.49 | 43.18 | 12.0   | 17.79 | 0   | 240 | 240   | 2.01     | 8.44     | 4.71 |

Table S1. 2: Coefficient of variation (CV) and sibling coefficient ( $\Psi$ ) of clones cones production in the Silver fir seed orchard. Missing data due to zero values or only one ramet per clone.

| Cl.  | $C_{2013}$ | $C_{2015}$ | $C_{2018}$ | $C_{2020}$ | $C_{2021}$ | $C_{2022}$ | $\Psi_{2013}$ | $\Psi_{2015}$ | $\Psi_{2018}$ | $\Psi_{2020}$ | $\Psi_{2021}$ | $\Psi_{2022}$ | C    | $\Psi$ |
|------|------------|------------|------------|------------|------------|------------|---------------|---------------|---------------|---------------|---------------|---------------|------|--------|
| 3.1  | 0.72       | 0.26       | 0.55       | 0.66       | 1.16       | 0.82       | 1.52          | 1.07          | 1.30          | 1.43          | 2.34          | 1.67          | 0.90 | 1.80   |
| 3.13 | 1.44       | 0.34       | 0.56       | 1.04       | 0.93       | 1.36       | 3.07          | 1.12          | 1.32          | 2.08          | 1.87          | 2.84          | 1.13 | 2.27   |
| 3.16 | 0.64       | 0.43       | 0.36       | 0.80       | 1.00       | 1.17       | 1.41          | 1.18          | 1.13          | 1.64          | 2.01          | 2.37          | 0.97 | 1.94   |
| 3.17 | 1.41       | 1.11       | 0.94       | 0.81       | -          | -          | 3.00          | 2.23          | 1.89          | 1.65          | -             | -             | 1.68 | 3.82   |
| 3.18 | -          | 1.41       | 0.28       | -          | -          | 1.41       | -             | 3.00          | 1.08          | -             | -             | 3.00          | 2.11 | 5.44   |
| 3.2  | 0.94       | 0.49       | 0.71       | 0.72       | 1.07       | 1.43       | 1.88          | 1.24          | 1.51          | 1.51          | 2.14          | 3.04          | 1.01 | 2.02   |
| 3.5  | 2.05       | 0.48       | 0.47       | 0.55       | 3.00       | 0.85       | 5.21          | 1.23          | 1.22          | 1.31          | 10.00         | 1.73          | 1.00 | 2.00   |
| 3.55 | 0.81       | 0.59       | 0.64       | 1.02       | 1.72       | 1.41       | 1.65          | 1.35          | 1.41          | 2.04          | 3.95          | 2.98          | 0.99 | 1.98   |
| 3.62 | 0.87       | 1.08       | 0.89       | 0.51       | 0.75       | 0.73       | 1.75          | 2.16          | 1.79          | 1.26          | 1.57          | 1.53          | 0.85 | 1.73   |
| 3.64 | 1.41       | 1.41       | 1.41       | 1.41       | -          | -          | 3.00          | 3.00          | 3.00          | 3.00          | -             | -             | 1.60 | 3.57   |
| 3.72 | 1.81       | 0.48       | 0.62       | 0.50       | 3.41       | 1.21       | 4.28          | 1.23          | 1.38          | 1.25          | 12.65         | 2.45          | 1.18 | 2.40   |
| 4.17 | 1.97       | 0.54       | 0.84       | 0.73       | 1.65       | 1.45       | 4.89          | 1.29          | 1.71          | 1.53          | 3.71          | 3.11          | 1.28 | 2.63   |
| 4.23 | -          | -          | -          | -          | -          | -          | -             | -             | -             | -             | -             | -             | 0.93 | 1.87   |
| 4.28 | 2.07       | 0.45       | 1.01       | 0.61       | 2.65       | 1.38       | 5.29          | 1.20          | 2.02          | 1.37          | 8.00          | 2.89          | 1.36 | 2.84   |
| 4.29 | 1.09       | 0.39       | 0.58       | 0.58       | 1.89       | 0.96       | 2.19          | 1.15          | 1.34          | 1.33          | 4.58          | 1.93          | 0.94 | 1.88   |
| 4.30 | 1.20       | 0.43       | 0.53       | 0.56       | 1.24       | 1.56       | 2.44          | 1.19          | 1.28          | 1.31          | 2.54          | 3.44          | 1.08 | 2.17   |
| 4.32 | 1.34       | 0.84       | 0.53       | 0.81       | 1.63       | 1.16       | 2.79          | 1.70          | 1.29          | 1.66          | 3.66          | 2.35          | 1.19 | 2.41   |
| 4.36 | 0.98       | 0.43       | 0.55       | 0.63       | 2.73       | 1.53       | 1.96          | 1.18          | 1.30          | 1.40          | 8.45          | 3.33          | 1.07 | 2.14   |
| 150  | -          | -          | -          | -          | -          | -          | -             | -             | -             | -             | -             | -             | 1.36 | 2.84   |
| 158  | 0.75       | 0.58       | 0.56       | 0.70       | 2.46       | 1.06       | 1.56          | 1.34          | 1.31          | 1.49          | 7.07          | 2.12          | 0.96 | 1.91   |
| 159  | -          | -          | -          | -          | -          | -          | -             | -             | -             | -             | -             | -             | 1.22 | 2.48   |
| 160  | 1.15       | 0.40       | 1.14       | 1.35       | 1.43       | 2.80       | 2.33          | 1.16          | 2.29          | 2.81          | 3.05          | 8.86          | 1.36 | 2.86   |
| 161  | 1.08       | 0.43       | 0.61       | 0.61       | 2.05       | 1.25       | 2.17          | 1.18          | 1.37          | 1.37          | 5.21          | 2.56          | 0.97 | 1.93   |
| 162  | 1.54       | 0.73       | 0.95       | 0.82       | 2.02       | 1.21       | 3.36          | 1.53          | 1.90          | 1.67          | 5.10          | 2.46          | 1.23 | 2.51   |
| 163  | 0.70       | 1.05       | 0.96       | 0.83       | 2.03       | 1.17       | 1.49          | 2.09          | 1.93          | 1.69          | 5.10          | 2.37          | 1.14 | 2.31   |
| 164  | 1.38       | 0.53       | 0.62       | 0.61       | 1.11       | 1.77       | 2.92          | 1.28          | 1.38          | 1.37          | 2.23          | 4.13          | 1.12 | 2.27   |
| 165  | 1.37       | 0.63       | 0.66       | 0.58       | 2.18       | 0.92       | 2.89          | 1.40          | 1.44          | 1.34          | 5.76          | 1.85          | 1.10 | 2.21   |
| 166  | 0.97       | 0.56       | 0.71       | 0.51       | 1.45       | 0.81       | 1.94          | 1.32          | 1.51          | 1.26          | 3.11          | 1.66          | 0.99 | 1.97   |
| 167  | 1.90       | 0.60       | 1.17       | 1.02       | 2.56       | 1.99       | 4.60          | 1.36          | 2.38          | 2.04          | 7.56          | 4.96          | 1.40 | 2.97   |
| 168  | -          | -          | -          | -          | -          | -          | -             | -             | -             | -             | -             | -             | 1.63 | 3.66   |
| 169  | 0.94       | 0.43       | 0.45       | 0.51       | 2.30       | 0.79       | 1.88          | 1.19          | 1.20          | 1.26          | 6.28          | 1.63          | 0.91 | 1.83   |
| 171  | 1.12       | 0.57       | 0.78       | 0.71       | 1.17       | 0.66       | 2.25          | 1.33          | 1.61          | 1.50          | 2.38          | 1.44          | 1.04 | 2.08   |
| 172  | 1.00       | 0.59       | 0.82       | 0.74       | 1.57       | 1.61       | 2.00          | 1.35          | 1.67          | 1.55          | 3.47          | 3.60          | 1.12 | 2.26   |
| 173  | 0.83       | 0.47       | 0.43       | 0.51       | 2.52       | 1.33       | 1.69          | 1.22          | 1.19          | 1.26          | 7.34          | 2.76          | 0.93 | 1.87   |
| 174  | 1.25       | 0.79       | 0.81       | 0.71       | 2.12       | 2.05       | 2.55          | 1.62          | 1.66          | 1.51          | 5.51          | 5.22          | 1.18 | 2.39   |
| 175  | 0.57       | 0.42       | 0.57       | 0.75       | 1.30       | 1.01       | 1.32          | 1.18          | 1.32          | 1.56          | 2.70          | 2.02          | 0.90 | 1.82   |
| 176  | 0.60       | 0.33       | 0.53       | 0.46       | 2.89       | 0.60       | 1.36          | 1.11          | 1.28          | 1.22          | 9.33          | 1.36          | 0.93 | 1.86   |
| 177  | 1.79       | 0.42       | 1.75       | 0.54       | 2.53       | 1.13       | 4.19          | 1.18          | 4.05          | 1.29          | 7.41          | 2.28          | 1.21 | 2.45   |
| 178  | 1.16       | 0.59       | 0.79       | 0.59       | 1.91       | 1.04       | 2.36          | 1.35          | 1.63          | 1.35          | 4.65          | 2.07          | 1.19 | 2.41   |
| 179  | 0.93       | 0.45       | 0.48       | 0.67       | 2.49       | 1.61       | 1.86          | 1.20          | 1.23          | 1.45          | 7.21          | 3.58          | 1.05 | 2.11   |

| Cl. | $C_{2013}$ | $C_{2015}$ | $C_{2018}$ | $C_{2020}$ | $C_{2021}$ | $C_{2022}$ | $\Psi_{2013}$ | $\Psi_{2015}$ | $\Psi_{2018}$ | $\Psi_{2020}$ | $\Psi_{2021}$ | $\Psi_{2022}$ | C    | $\Psi$ |
|-----|------------|------------|------------|------------|------------|------------|---------------|---------------|---------------|---------------|---------------|---------------|------|--------|
| 180 | 0.92       | 0.49       | 0.58       | 0.81       | 1.48       | 1.16       | 1.84          | 1.24          | 1.33          | 1.65          | 3.20          | 2.35          | 0.98 | 1.96   |
| 181 | 1.27       | 0.38       | 0.73       | 0.73       | 1.33       | 1.62       | 2.62          | 1.14          | 1.53          | 1.54          | 2.78          | 3.62          | 1.10 | 2.21   |
| 182 | 0.44       | 0.46       | 0.42       | 0.87       | 1.88       | 1.25       | 1.19          | 1.21          | 1.18          | 1.75          | 4.52          | 2.56          | 0.89 | 1.80   |
| 1N  | 1.38       | 0.82       | 0.99       | 0.87       | 2.36       | 1.35       | 2.90          | 1.67          | 1.98          | 1.75          | 6.57          | 2.81          | 1.37 | 2.88   |
