# Supplementary material
Source: MDPI journal article supplement (https://www.mdpi.com/1999-4907/14/1/17)
Supplement: s1 [file s1 › SupplementaryMaterialS4_Heritability.pdf]

## Supplementary Material S4. Posterior distributions of clone variance and heritability, annual data

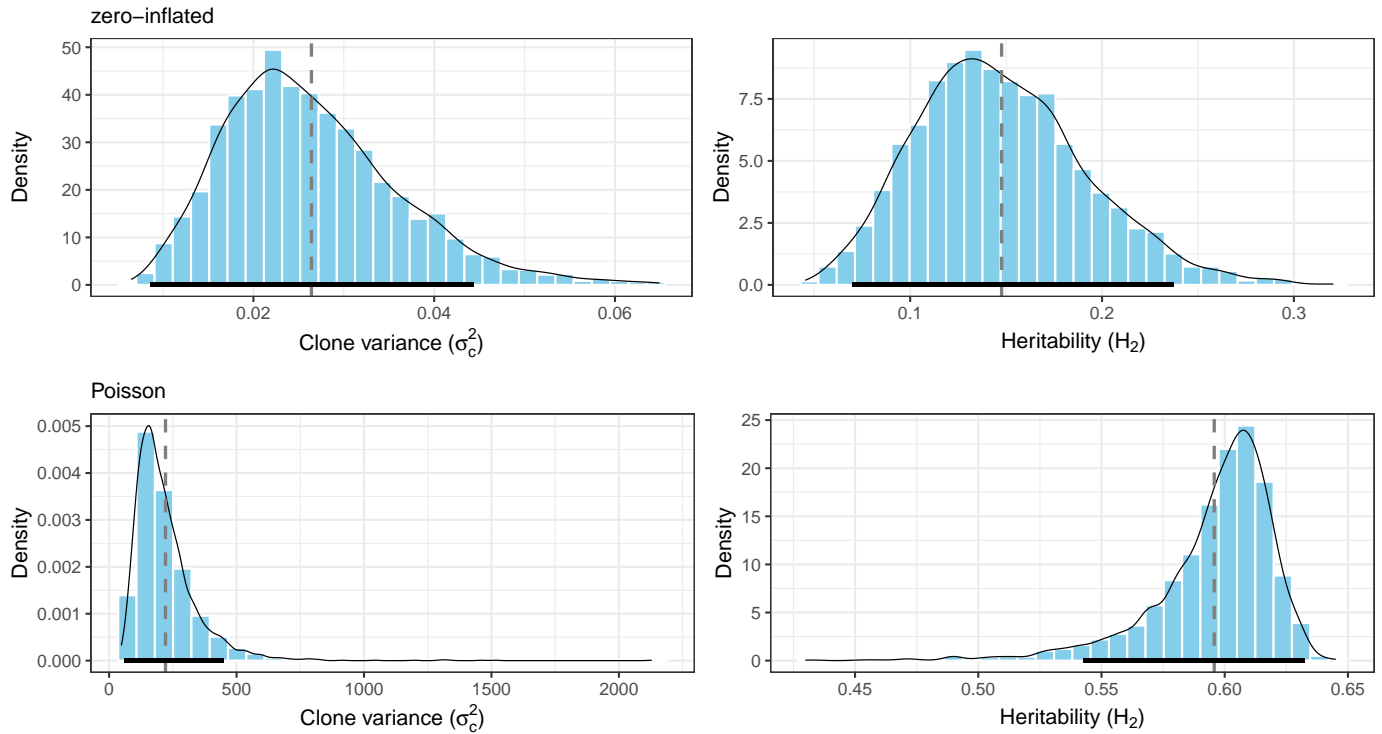

Figure S4. 1: Clone variance and heritability, in zero-inflated and Poisson components of the 2013 model. Bars: posterior MCMC samples, thin solid line: kernel density estimation, dotted line: posterior mean,, point line: posterior median, thick solid line: 95% credible intervals. Estimations are in data scale.

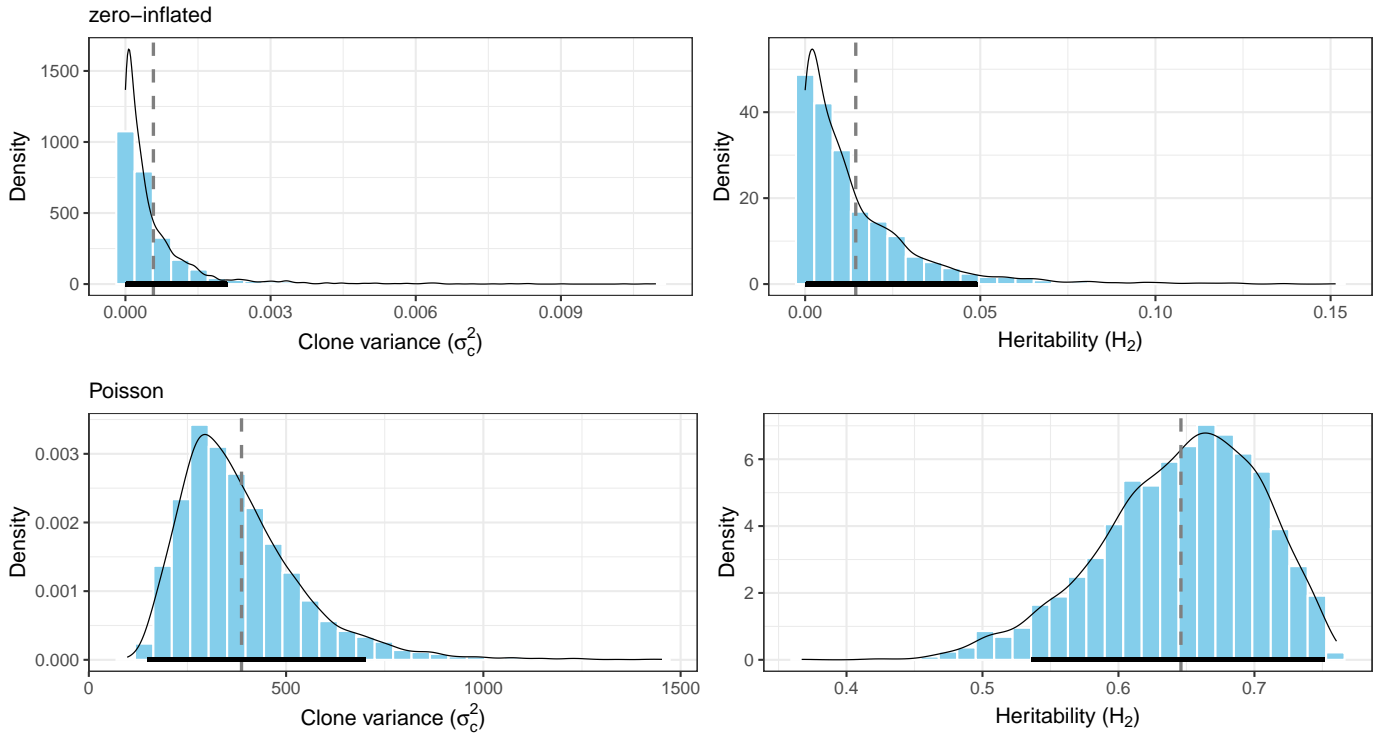

Figure S4. 2: Clone variance and heritability, in zero-inflated and Poisson components of the 2015 model. The legend of the plot is similar to figure 1.

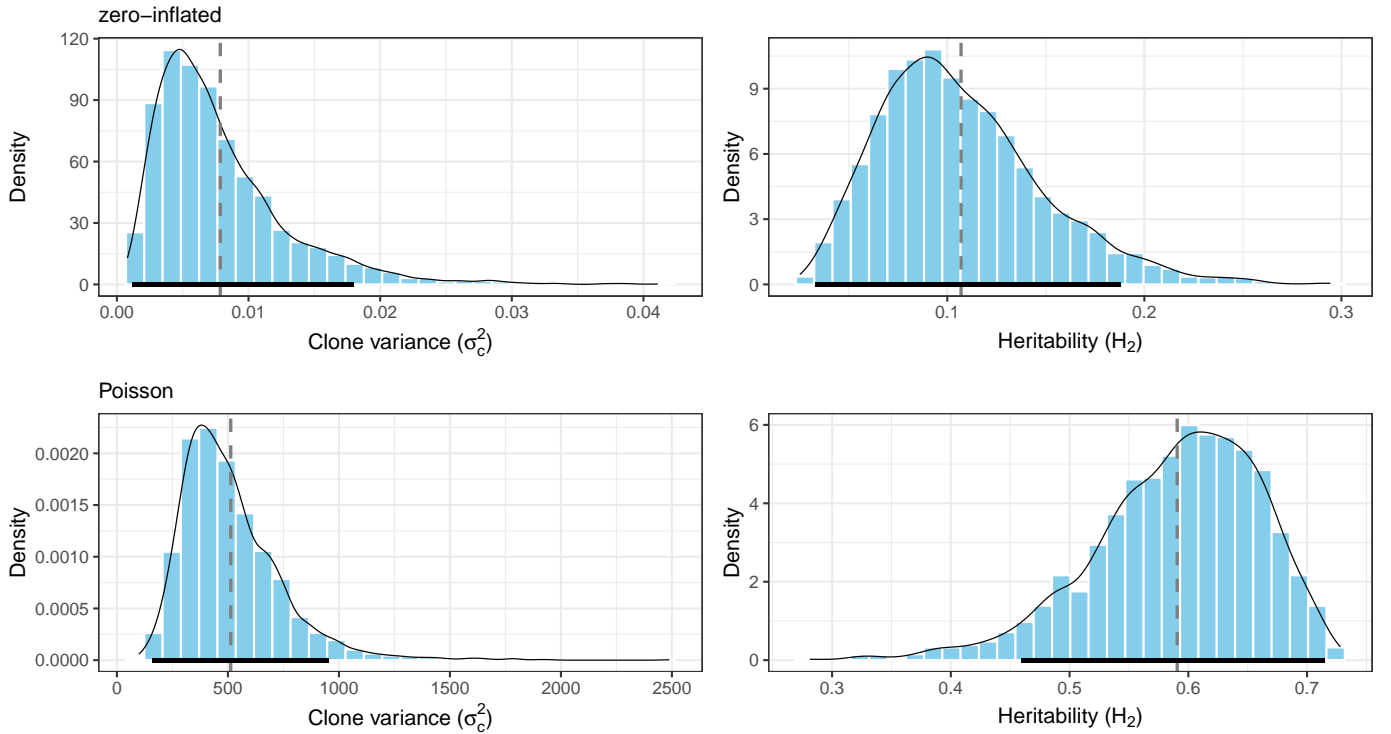

Figure S4. 3: Clone variance and heritability, in zero-inflated and Poisson components of the 2018 model. The legend of the plot is similar to figure 1.

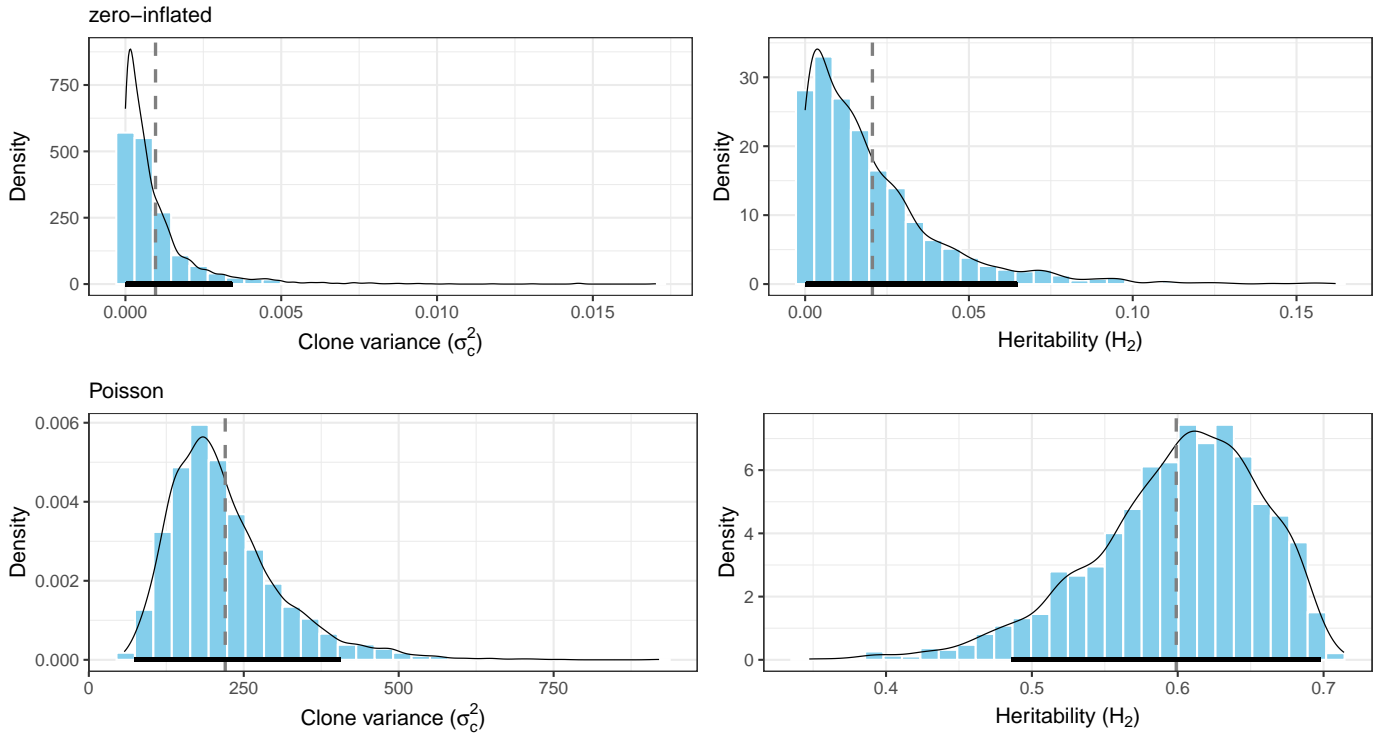

Figure S4. 4: Clone variance and heritability, in zero-inflated and Poisson components of the 2020 model. The legend of the plot is similar to figure 1.

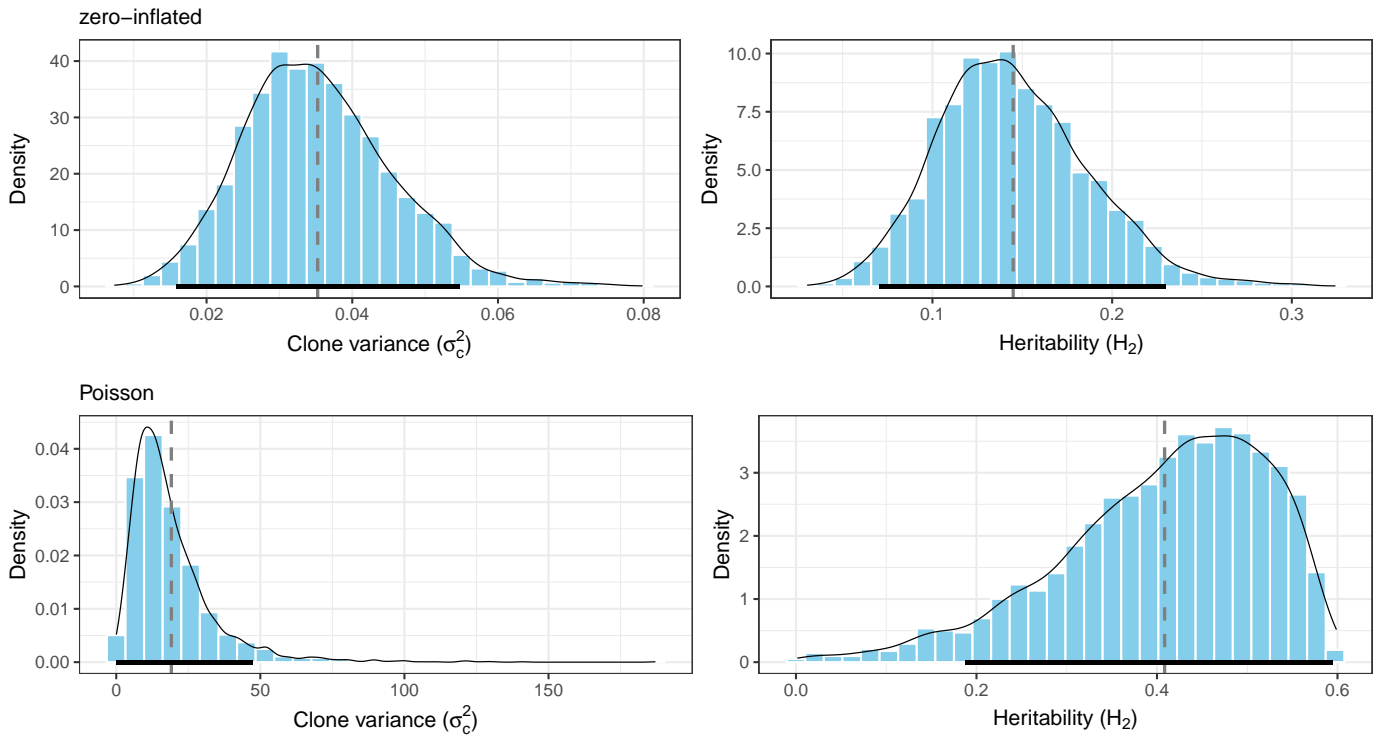

Figure S4. 5: Clone variance and heritability, in zero-inflated and Poisson components of the 2021 model. The legend of the plot is similar to figure 1.

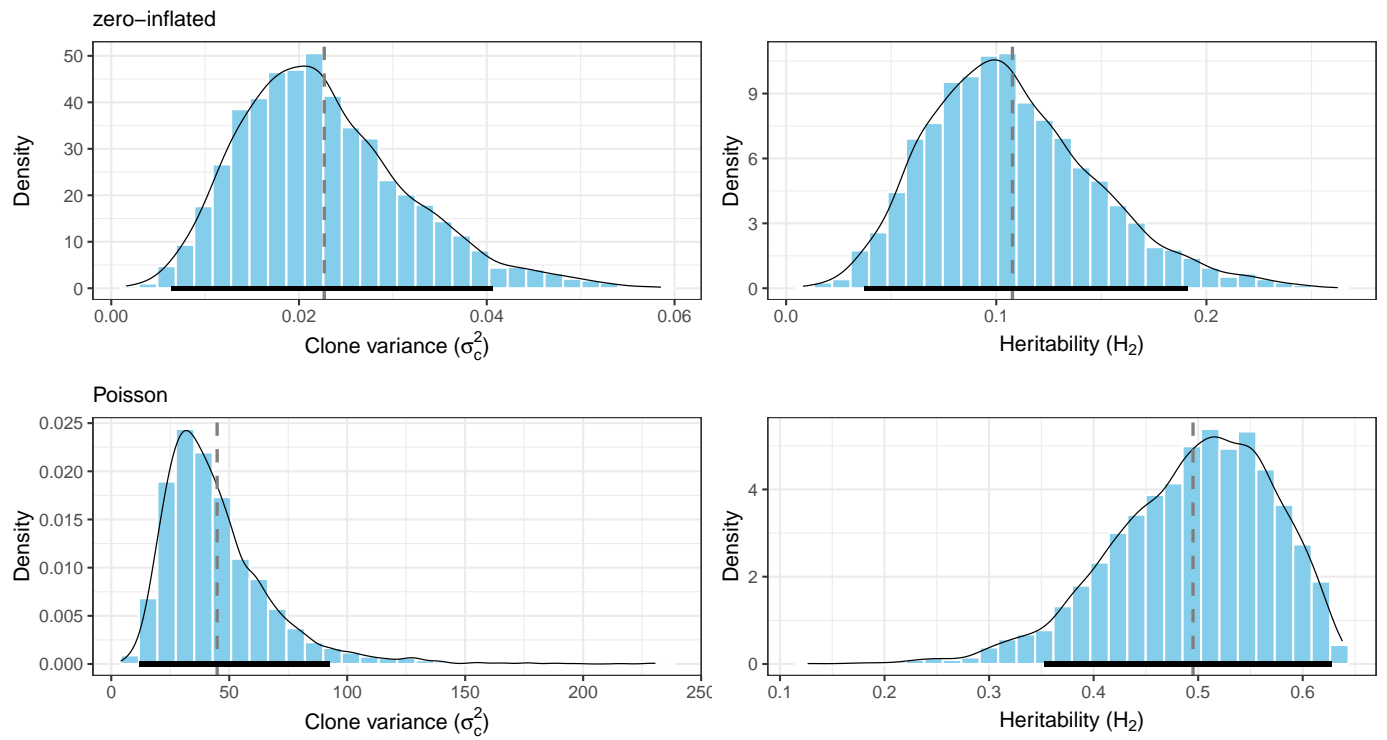

Figure S4. 6: Clone variance and heritability, in zero-inflated and Poisson components of the 2022 model. The legend of the plot is similar to figure 1.
